# Supplementary material for: [MII(H2dapsc)]-[Cr(CN)6] (M = Mn, Co) Chain and Trimer Complexes: Synthesis, Crystal Structure, Non-Covalent Interactions and Magnetic Properties
Source: MDPI journal article supplement (doi:10.3390/molecules27238518), 2022-12-03
Supplement: s1 [file s1]

## Supplementary Information

|                   |                                                                                                                                                        |        |
|-------------------|--------------------------------------------------------------------------------------------------------------------------------------------------------|--------|
| <b>Figure S1</b>  | Interchain hydrogen bonds in the (0 1 0) plane of the structure <b>1</b>                                                                               | p. S2  |
| <b>Table S1</b>   | Hydrogen bond geometry in <b>1</b> .                                                                                                                   | p. S2  |
| <b>Table S2</b>   | Hydrogen bond geometry in <b>2</b> .                                                                                                                   | p. S3  |
| <b>Table S3</b>   | Hydrogen bond geometry in <b>3</b> .                                                                                                                   | p. S4  |
| <b>Table S4</b>   | Hydrogen bond geometry in <b>4</b> .                                                                                                                   | p. S4  |
| <b>Figure S2</b>  | Temperature dependences of inverted magnetic susceptibility for <b>1-4</b> .                                                                           | p. S5  |
| <b>Table S5</b>   | Weiss temperatures in the complexes <b>1-4</b> .                                                                                                       | p. S5  |
| <b>Figure S3</b>  | Temperature dependences of the magnetization (a) and dc magnetic susceptibility (b) for <b>2</b> at different magnetic fields.                         | p. S5  |
| <b>Figure S4</b>  | Magnetic dc field dependences of real ( $\chi'$ ) and imaginary ( $\chi''$ ) parts of ac magnetic susceptibility at $T = 2.0$ K for complex <b>2</b> . | p. S6  |
| <b>Figure S5</b>  | Frequency dependencies of ac magnetic susceptibility at 2.0, 2.5 and 3.0 K for complex <b>2</b> in a zero dc field.                                    | p. S6  |
| <b>Figure S6</b>  | Frequency dependencies of ac magnetic susceptibility at 2.0-3.5 K temperature range for complex <b>2</b> under 1.5 kOe dc field.                       | p. S7  |
| <b>Figure S7</b>  | Frequency dependencies of ac magnetic susceptibility at 1.8-5.0 K temperature range for complex <b>4</b> under 1.5 kOe dc field.                       | p. S7  |
| <b>Figure S8</b>  | Frequency dependencies of $\chi'$ and $\chi''$ at different temperatures for complex <b>1</b> in a zero dc field.                                      | p. S8  |
| <b>Figure S9</b>  | The dependence of $\ln(\tau)$ vs $T^{-1}$ for <b>1</b> in a zero dc field.                                                                             | p. S8  |
| <b>Figure S10</b> | TG-DSC curves and mass spectra for complex <b>1</b> after drying in vacuum.                                                                            | p. S9  |
| <b>Figure S11</b> | IR (a) and Raman (b) spectra of the complex <b>1</b> .                                                                                                 | p. S10 |
| <b>Figure S12</b> | TG-DSC curves and mass spectra for complex <b>2</b> after drying in vacuum.                                                                            | p. S11 |
| <b>Figure S13</b> | IR spectrum of the complex <b>2</b> .                                                                                                                  | p. S11 |
| <b>Figure S14</b> | Powder diffraction pattern for a dried sample of <b>2</b> .                                                                                            | p. S12 |
| <b>Figure S15</b> | IR spectrum of the complex <b>3</b> .                                                                                                                  | p. S13 |
| <b>Figure S16</b> | IR spectrum of the complex <b>4</b> .                                                                                                                  | p. S13 |

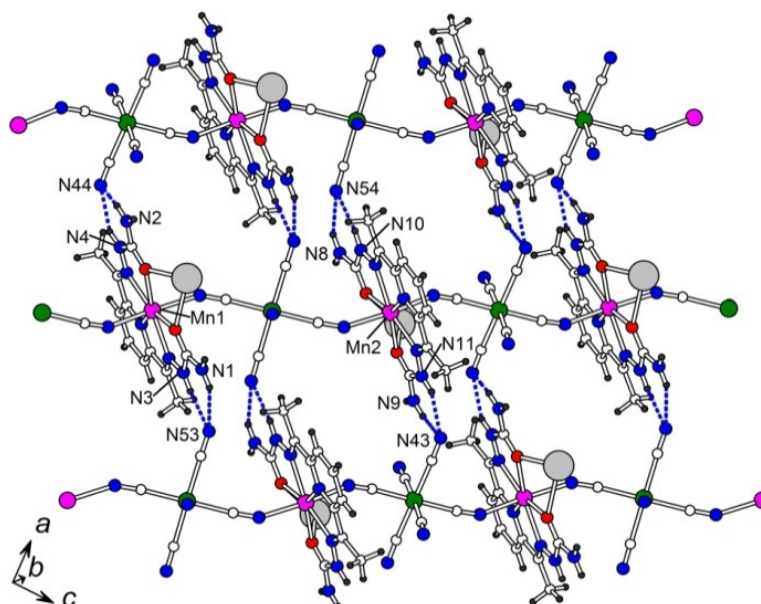

Figure S1. Interchain hydrogen bonds (shown by blue dashed lines) in the (0 1 0) plane of the structure **1** (water and ethanol molecules are omitted for clarity). Hydrogen bonds are shown by blue dashed lines (see Tables S1 and S2 for hydrogen bond geometry in **1** and **2**, respectively).

Table S1. Hydrogen bond geometry in **1**.

| Donor--H..Acceptor | [symmetry]      | D-H, Å  | H...A, Å | D...A, Å | D-H...A, ° |         |
|--------------------|-----------------|---------|----------|----------|------------|---------|
| N1 --H1B ..N53     | [x+1,y,z]       | 0.83(3) | 2.27(3)  | 3.052(4) | 157(3)     | Fig. S1 |
| N3 --H3 ..N53      | [x+1,y,z]       | 0.83(2) | 2.19(3)  | 2.945(4) | 152(3)     | Fig. S1 |
| N2 --H2B ..N44     | [x+1,y,z]       | 0.83(3) | 2.50(3)  | 3.251(4) | 150(3)     | Fig. S1 |
| N4 --H4 ..N44      | [x-1,y,z]       | 0.84(3) | 2.16(3)  | 2.932(4) | 155(3)     | Fig. S1 |
| N8 --H8B ..N54     | [1-x,y+0.5,-z]  | 0.83(3) | 2.28(3)  | 3.036(4) | 152(3)     | Fig. S1 |
| N10 --H10 ..N54    | [1-x,y+0.5,-z]  | 0.83(3) | 2.18(3)  | 2.914(4) | 148(3)     | Fig. S1 |
| N9 --H9B ..N43     | [-x,y+0.5,1-z]  | 0.83(3) | 2.53(3)  | 3.239(4) | 143(3)     | Fig. S1 |
| N11 --H11 ..N43    | [-x,y+0.5,1-z]  | 0.84(3) | 2.10(3)  | 2.903(4) | 162(3)     | Fig. S1 |
| N1 --H1A ..O5W     | [x,y,z]         | 0.83(3) | 2.09(3)  | 2.904(4) | 169(3)     | Fig. 2  |
| N2 --H2A ..O3W     | [x,y,z]         | 0.83(2) | 2.17(2)  | 2.994(4) | 172(3)     | Fig. 2  |
| N8 --H8A ..O7W     | [x,y,z]         | 0.84(3) | 2.12(3)  | 2.938(4) | 166(3)     |         |
| N9 --H9A ..O4WA    | [x,y,z]         | 0.83(2) | 2.08(2)  | 2.904(4) | 169(3)     | Fig. 2  |
| N9 --H9A ..O4WB    | [x,y,z]         | 0.83(2) | 2.16(2)  | 2.899(4) | 148(3)     |         |
| O2W --H2WB ..N45   | [1-x,y+0.5,1-z] | 0.82    | 2.46     | 3.172(4) | 146        | Fig. 2  |
| O3W --H3WB ..N45   | [1-x,y+0.5,1-z] | 0.80(3) | 2.27(3)  | 3.044(3) | 163(3)     | Fig. 2  |
| O6W --H6WB ..N45   | [1-x,y+0.5,1-z] | 0.82(4) | 2.14(4)  | 2.924(4) | 161(3)     | Fig. 2  |
| O3W --H3WA ..N46   | [x-1,y,z]       | 0.82(3) | 2.06(3)  | 2.823(3) | 156(3)     |         |
| O4WA--H4WA ..N46   | [x-1,y,z]       | 0.80(4) | 2.29(5)  | 3.039(4) | 156(4)     |         |
| O5W --H5WB ..N56   | [x,y,z]         | 0.83    | 2.19     | 2.833(4) | 134        | Fig. 2  |
| O7W --H7WB ..N56   | [x,y,z]         | 0.82(4) | 2.50(4)  | 3.121(5) | 134(3)     |         |
| O7W --H7WA ..N55   | [-x,y+0.5,-z]   | 0.81(4) | 1.97(4)  | 2.777(4) | 175(3)     |         |
| O8W --H8WA ..N55   | [-x,y+0.5,-z]   | 0.81    | 2.39     | 3.194(5) | 169        |         |
| O8W --H8WB ..O3    | [x,y,z]         | 0.82    | 2.37     | 2.971(6) | 131        |         |

|      |        |       |               |         |         |          |        |
|------|--------|-------|---------------|---------|---------|----------|--------|
| O8W  | --H8WB | ..O4  | [x,y,z]       | 0.82    | 2.48    | 3.095(5) | 132    |
| O9W  | --H9WA | ..N54 | [-x,y+0.5,-z] | 0.83    | 2.56    | 3.369(6) | 168    |
| O1W  | --H1W  | ..O7W | [x,y,z]       | 0.81(3) | 1.94(3) | 2.725(3) | 163(5) |
| O2W  | --H2WA | ..O9W | [x+1,y,z]     | 0.83    | 2.11    | 2.910(6) | 161    |
| O4WA | --H4WB | ..O6W | [x-1,y,z]     | 0.82(4) | 2.05(4) | 2.826(4) | 156(5) |
| O5W  | --H5WA | ..O8W | [x+1,y,z]     | 0.83    | 2.29    | 3.110(6) | 169    |
| O9W  | --H9WB | ..O8W | [x,y,z]       | 0.82    | 2.01    | 2.756(7) | 151    |

Table S2. Hydrogen bond geometry in **2**.

| Donor--H..Acceptor |        |        | [symmetry]      | D-H, Å  | H...A, Å | D...A, Å | D-H...A, ° |
|--------------------|--------|--------|-----------------|---------|----------|----------|------------|
| N1                 | --H1B  | ..N53  | [x+1,y,z]       | 0.82(4) | 2.43(4)  | 3.137(5) | 146(4)     |
| N3                 | --H3   | ..N53  | [x+1,y,z]       | 0.81(3) | 2.16(4)  | 2.905(4) | 153(4)     |
| N2                 | --H2B  | ..N44  | [x+1,y,z]       | 0.81(4) | 2.55(3)  | 3.269(5) | 148(3)     |
| N4                 | --H4   | ..N44  | [x+1,y,z]       | 0.81(3) | 2.15(4)  | 2.925(4) | 161(3)     |
| N8                 | --H8B  | ..N54  | [1-x,y+0.5,-z]  | 0.81(3) | 2.40(4)  | 3.100(4) | 145(4)     |
| N10                | --H10  | ..N54  | [1-x,y+0.5,-z]  | 0.80(3) | 2.12(3)  | 2.876(4) | 157(5)     |
| N9                 | --H9B  | ..N43  | [-x,y+0.5,1-z]  | 0.81(4) | 2.60(5)  | 3.272(5) | 142(4)     |
| N11                | --H11  | ..N43  | [-x,y+0.5,1-z]  | 0.82(3) | 2.12(3)  | 2.885(4) | 157(3)     |
| N1                 | --H1A  | ..O5W  | [x,y,z]         | 0.81(3) | 2.19(4)  | 2.930(6) | 152(4)     |
| N2                 | --H2A  | ..O3W  | [x,y,z]         | 0.81(2) | 2.15(2)  | 2.945(4) | 168(4)     |
| N8                 | --H8A  | ..O7W  | [x,y,z]         | 0.82(3) | 2.16(3)  | 2.965(5) | 168(3)     |
| N9                 | --H9A  | ..O4WA | [x,y,z]         | 0.81(2) | 2.11(3)  | 2.889(6) | 161(5)     |
| N9                 | --H9A  | ..O4WB | [x,y,z]         | 0.81(2) | 2.06(3)  | 2.811(6) | 154(5)     |
| O2W                | --H2WB | ..N45  | [1-x,y+0.5,1-z] | 0.88(4) | 2.34(3)  | 3.129(5) | 150(5)     |
| O3W                | --H3WB | ..N45  | [1-x,y+0.5,1-z] | 0.82(4) | 2.25(4)  | 3.014(4) | 156(4)     |
| O6W                | --H6WB | ..N45  | [1-x,y+0.5,1-z] | 0.80(4) | 2.34(5)  | 2.970(5) | 137(4)     |
| O3W                | --H3WA | ..N46  | [x-1,y,z]       | 0.83(3) | 2.05(4)  | 2.810(5) | 151(4)     |
| O4WA               | --H4WA | ..N46  | [x-1,y,z]       | 0.82(6) | 2.25(6)  | 3.041(6) | 164(7)     |
| O5W                | --H5WB | ..N56  | [x,y,z]         | 0.83    | 2.19     | 2.874(6) | 140        |
| O7W                | --H7WB | ..N56  | [x,y,z]         | 0.83(4) | 2.53(5)  | 3.177(6) | 136(4)     |
| O7W                | --H7WA | ..N55  | [-x,y+0.5,-z]   | 0.82(4) | 1.94(5)  | 2.755(5) | 169(4)     |
| O8W                | --H8WA | ..N55  | [-x,y+0.5,-z]   | 0.79(6) | 2.36(5)  | 3.095(5) | 156(6)     |
| O8W                | --H8WB | ..O3   | [x,y,z]         | 0.78(6) | 2.40(6)  | 2.966(6) | 130(5)     |
| O8W                | --H8WB | ..O4   | [x,y,z]         | 0.78(6) | 2.23(5)  | 2.916(5) | 147(5)     |
| O9W                | --H9WA | ..N54  | [-x,y+0.5,-z]   | 0.82    | 2.46     | 3.246(6) | 161        |
| O1W                | --H1W  | ..O7W  | [x,y,z]         | 0.92(5) | 1.87(5)  | 2.716(4) | 153(4)     |
| O2W                | --H2WA | ..O9W  | [x+1,y,z]       | 0.87(4) | 2.00(5)  | 2.862(7) | 173(4)     |
| O4WA               | --H4WB | ..O6W  | [x-1,y,z]       | 0.82(6) | 2.35(7)  | 2.810(6) | 117(6)     |
| O5W                | --H5WA | ..O8W  | [x+1,y,z]       | 0.82    | 2.10     | 2.921(6) | 172        |
| O9W                | --H9WB | ..O8W  | [x,y,z]         | 0.84    | 1.92     | 2.702(8) | 156        |

Table S3. Hydrogen bond geometry in **3**.

| Donor--H...Acceptor [symmetry] |        |       |                   | D-H, Å  | H...A, Å | D...A, Å | D-H...A, ° |        |
|--------------------------------|--------|-------|-------------------|---------|----------|----------|------------|--------|
| N1                             | --H1A  | ..O1  | [-x, -y, -z]      | 0.85(2) | 2.20(2)  | 2.987(2) | 154(2)     | Fig. 5 |
| N1                             | --H1A  | ..O2  | [-x, -y, -z]      | 0.85(2) | 2.43(2)  | 2.910(2) | 117(2)     |        |
| N1                             | --H1B  | ..Cl1 | [-x,y-0.5,0.5-z]  | 0.85(2) | 2.37(2)  | 3.180(3) | 159(2)     |        |
| N2                             | --H2A  | ..Cl1 | [x,0.5-y,z-0.5]   | 0.83(2) | 2.83(2)  | 3.660(2) | 174(2)     |        |
| N3                             | --H3   | ..Cl1 | [-x,y-0.5,0.5-z]  | 0.82(2) | 2.51(2)  | 3.228(2) | 148(2)     |        |
| N3                             | --H3   | ..O4  | [-x,y-0.5,0.5-z]  | 0.82(2) | 2.34(2)  | 3.109(5) | 158(2)     |        |
| N4                             | --H4   | ..N10 | [x, 0.5-y, z+0.5] | 0.83(2) | 2.08(2)  | 2.895(2) | 167(2)     |        |
| O3                             | --H3WA | ..N9  | [x-1,y,z]         | 0.84(2) | 2.04(2)  | 2.869(2) | 173(2)     | Fig. 5 |
| O3                             | --H3WB | ..Cl1 | [x,y,z]           | 0.83(2) | 2.31(2)  | 3.194(2) | 158(2)     | Fig. 5 |
| O3                             | --H3WC | ..Cl1 | [-x,-y,1-z]       | 0.83(2) | 2.33(3)  | 3.110(2) | 160(3)     | Fig. 5 |
| O4                             | --H4A  | ..O3  | [x,y,z]           | 0.83(2) | 2.45(4)  | 3.141(5) | 140(3)     | Fig. 5 |
| O4                             | --H4B  | ..O3  | [-x,-y,1-z]       | 0.83(2) | 1.98(3)  | 2.806(5) | 177(3)     | Fig. 5 |

Table S4. Hydrogen bond geometry in **4**.

| Donor--H...Acceptor [symmetry] |        |       |              | D-H, Å  | H...A, Å | D...A, Å | D-H...A, ° |        |
|--------------------------------|--------|-------|--------------|---------|----------|----------|------------|--------|
| N1                             | --H1A  | ..O4  | [-x,1-y,-z]  | 0.81(3) | 2.16(2)  | 2.933(6) | 160(1)     | Fig. 7 |
| N1                             | --H1B  | ..N9  | [-x,-y,-z]   | 0.81(3) | 2.51(2)  | 3.171(6) | 140(1)     |        |
| N3                             | --H3   | ..N9  | [-x,-y,-z]   | 0.81(3) | 2.15(2)  | 2.890(6) | 152(1)     |        |
| N2                             | --H2A  | ..Cl1 | [-x,1-y,-z]  | 0.81(3) | 2.26(2)  | 3.065(6) | 175(2)     |        |
| N2                             | --H2A  | ..O6  | [-x,1-y,-z]  | 0.81(3) | 2.09(2)  | 2.903(6) | 173(2)     |        |
| N2                             | --H2B  | ..N8  | [1-x,1-y,-z] | 0.81(3) | 2.59(2)  | 3.278(6) | 144(1)     |        |
| N4                             | --H4   | ..N8  | [1-x,1-y,-z] | 0.80(3) | 2.67(2)  | 3.297(6) | 137(1)     |        |
| O3                             | --H3A1 | ..Cl1 | [x,y,z]      | 0.87(3) | 2.14(1)  | 3.009(5) | 170(1)     | Fig. 7 |
| O3                             | --H3B1 | ..O1  | [-x,1-y,-z]  | 0.88(3) | 1.99(2)  | 2.868(5) | 177(1)     |        |
| O3                             | --H3A2 | ..O4  | [x,y,z]      | 0.88(3) | 1.91(2)  | 2.752(6) | 160(1)     |        |
| O3                             | --H3B2 | ..O2  | [-x,1-y,-z]  | 0.88(3) | 2.12(2)  | 2.955(5) | 159(1)     |        |
| O4                             | --H4A  | ..O3  | [x,y,z]      | 0.88(3) | 1.89(2)  | 2.752(5) | 165(1)     |        |
| O4                             | --H4B  | ..O5  | [x,y,z]      | 0.88(3) | 1.86(2)  | 2.711(6) | 163(1)     |        |
| O5                             | --H5A  | ..N10 | [1-x,1-y,-z] | 0.87(3) | 1.91(2)  | 2.782(6) | 175(1)     |        |
| O5                             | --H5B1 | ..O4  | [x,y,z]      | 0.88(3) | 1.91(2)  | 2.711(6) | 152(1)     | Fig. 7 |
| O5                             | --H5B2 | ..Cl1 | [-x,1-y,1-z] | 0.87(3) | 2.01(2)  | 2.858(7) | 164(1)     |        |
| O6                             | --H6A  | ..O3  | [x,y,z]      | 0.88(3) | 2.11(2)  | 2.983(5) | 171(1)     |        |
| O6                             | --H6B  | ..O5  | [-x,1-y,1-z] | 0.88(3) | 2.17(2)  | 3.032(6) | 167(1)     |        |

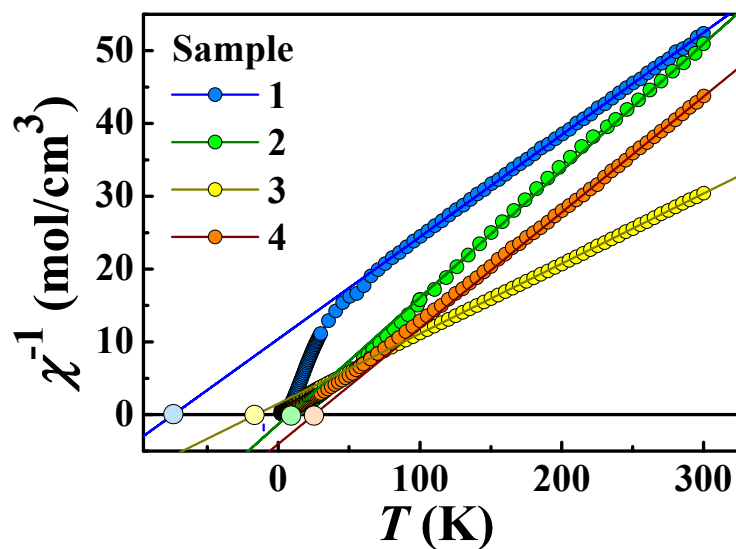

Figure S2. Temperature dependences of inverted magnetic susceptibility for the complexes **1** - **4**. Solid lines show approximations by Curie-Weiss law.

Table S5. Weiss temperatures in the complexes **1**, **2**, **3** and **4**.

| Complexes | $T_{\text{Weiss}}$ |
|-----------|--------------------|
| <b>1</b>  | -75 K              |
| <b>2</b>  | +7.0 K             |
| <b>3</b>  | -15.6 K            |
| <b>4</b>  | +27 K              |

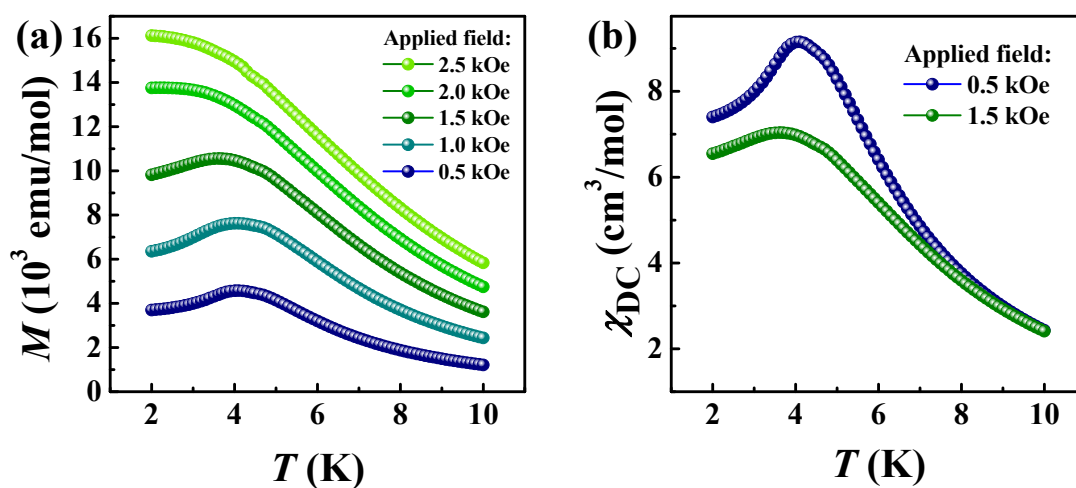

Figure S3. Temperature dependences of the magnetization  $M$  (a) and DC magnetic susceptibility  $\chi_{\text{DC}}$  (b) for **2** recorded at different magnetic fields.

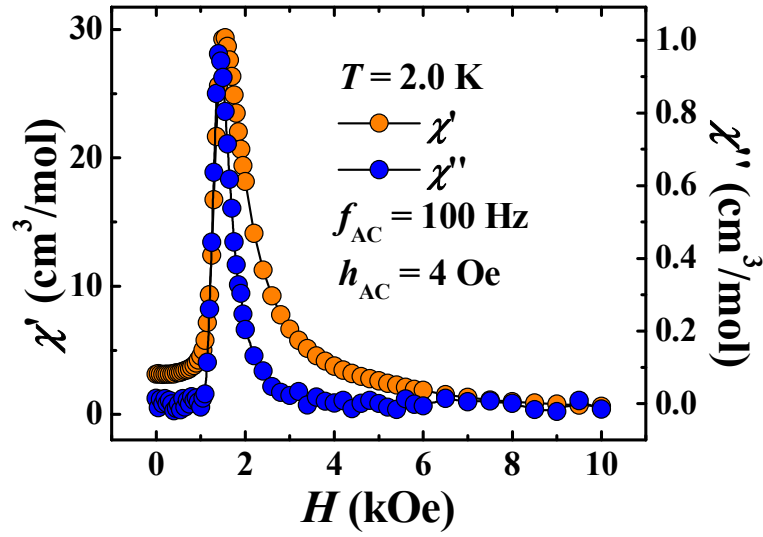

Figure S4. Magnetic dc field dependences of real ( $\chi'$ ) and imaginary ( $\chi''$ ) parts of ac magnetic susceptibility at  $T = 2.0$  K for complex **2**. AC field amplitude and frequency are  $h_{AC} = 4$  Oe and  $f_{AC} = 100$  Hz, respectively. The maximum of  $\chi'$  at the dc field  $H_{MAX} = 1.5$  kOe corresponds to metamagnetic transition. The response of  $\chi''$  to the transition can be detected, but the  $\chi''$  value is only of 3 percent of  $\chi'$ .

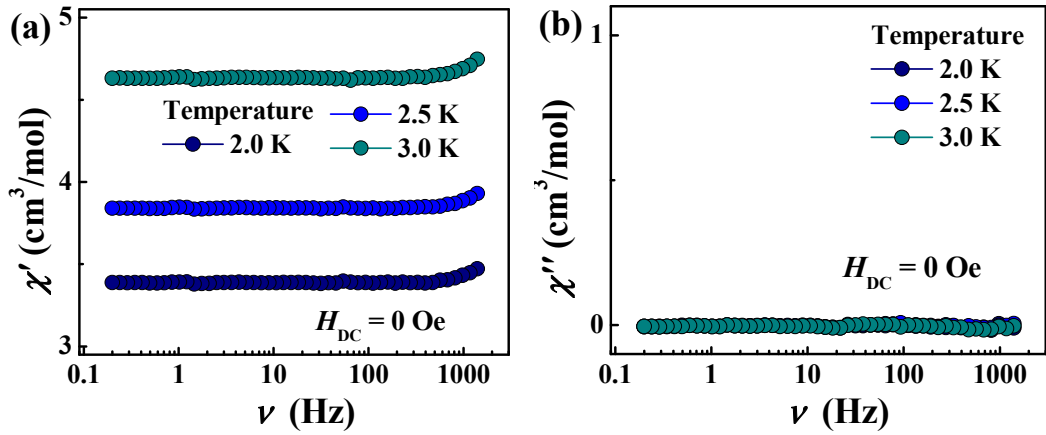

Figure S5. Frequency dependencies of ac magnetic susceptibility at 2.0 K, 2.5 K and 3.0 K for complex **2** in a zero dc field. The ac-field amplitude was  $h_{AC} = 4$  Oe.

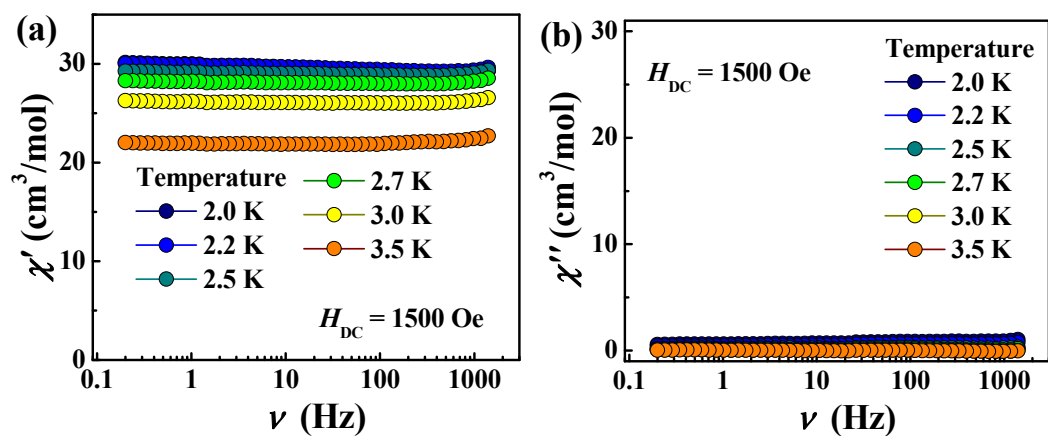

Figure S6. Frequency dependencies of ac magnetic susceptibility at 2.0 K – 3.5 K temperature range for complex **2**, recorded under 1.5 kOe dc field.

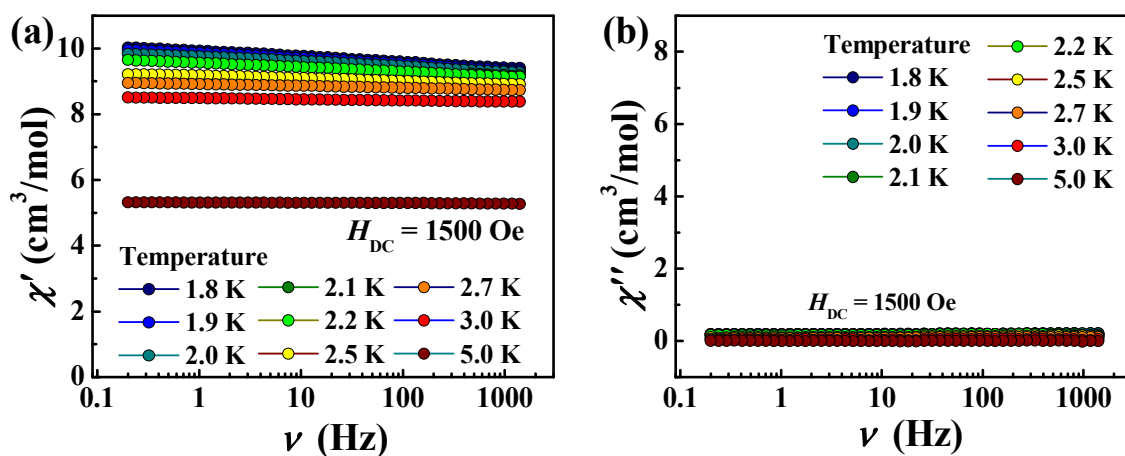

Figure S7. Frequency dependencies of ac magnetic susceptibility at 1.8 K – 5.0 K temperature range for complex **4**, recorded under 1.5 kOe dc field.

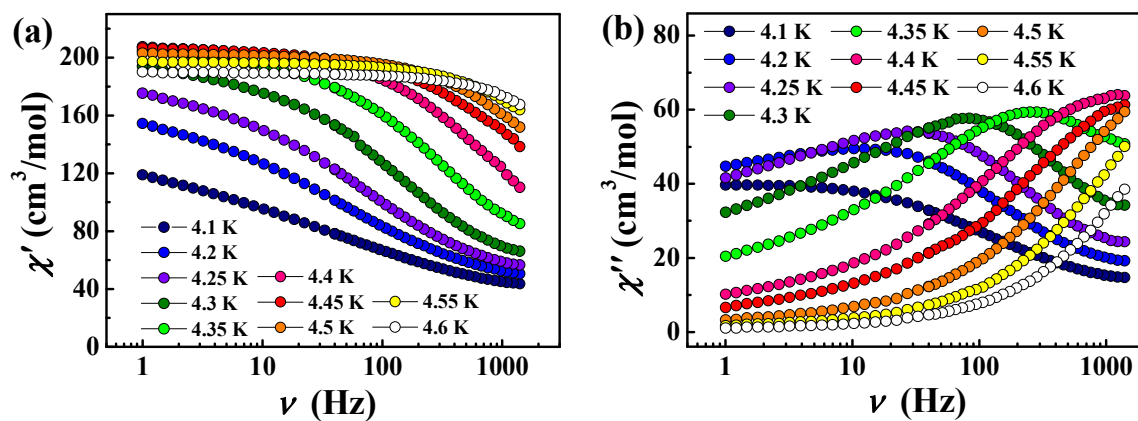

Figure S8. Frequency dependencies of  $\chi'$  and  $\chi''$  at different temperatures for complex **1** in a zero dc field.

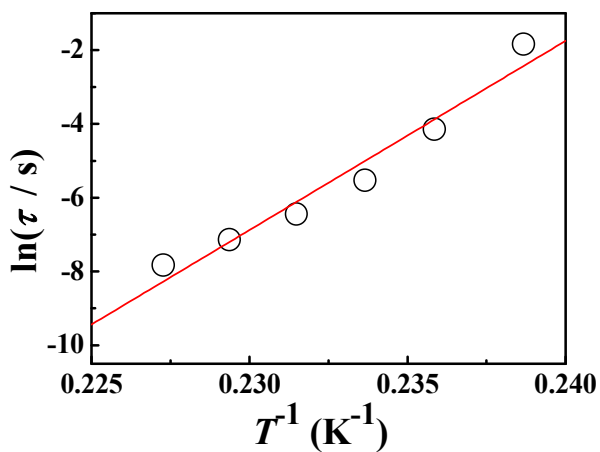

Figure S9. The dependence of  $\ln(\tau)$  vs  $T^{-1}$  for **1** in a zero dc field and its approximation by the Arrhenius formula (solid line). The points were obtained from the temperature dependences  $\chi''(T)$  at different frequencies (Figure 10, main text). Approximation parameters: activation energy  $U_{\text{eff}} = 512$  K, pre exponential factor  $\tau_0 = 6.5 \cdot 10^{-55}$  s.



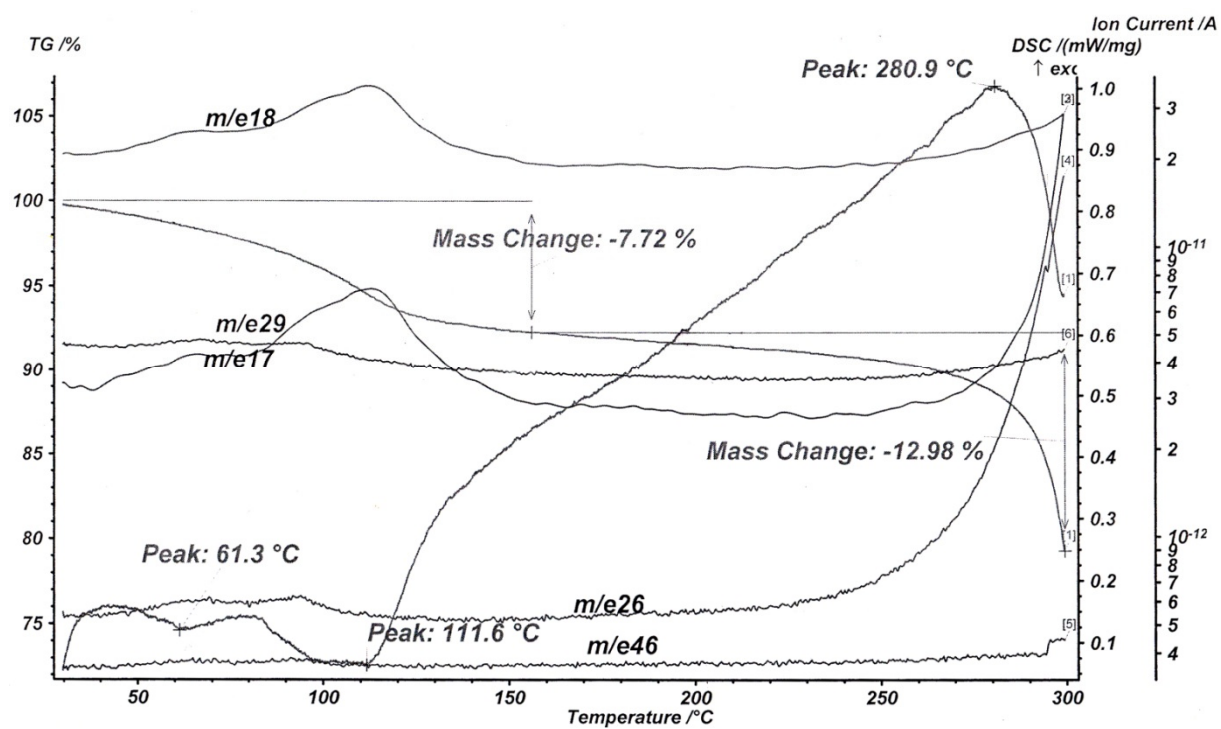

Figure S10. TG-DSC curves and mass spectra for complex 1 after drying in vacuum.

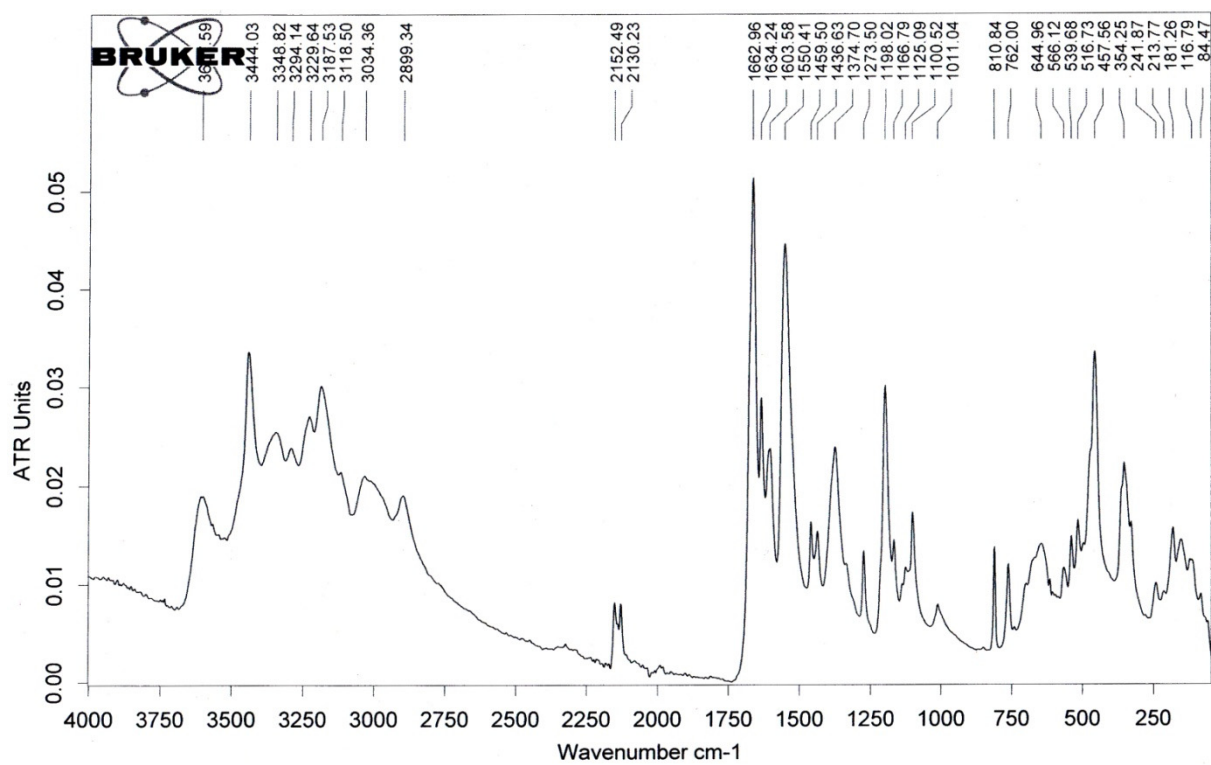

(a)

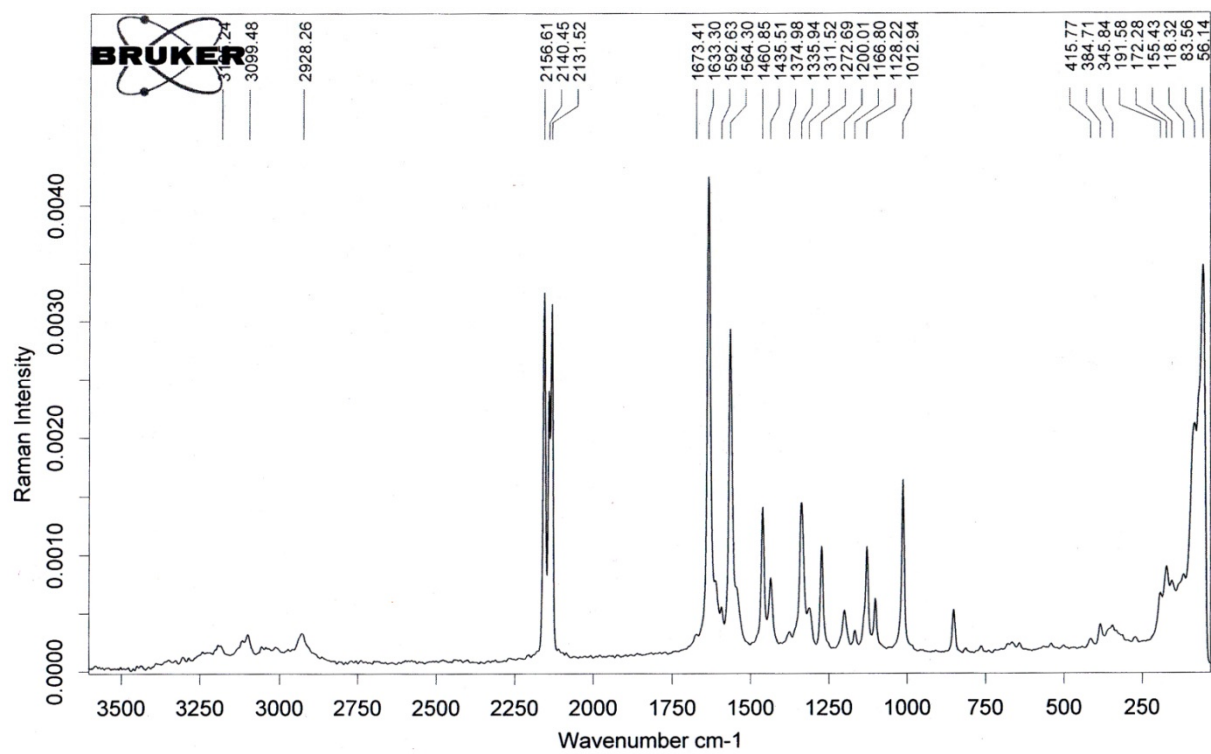

(b)

Figure S11. IR (a) and Raman (b) spectra of the complex 1.

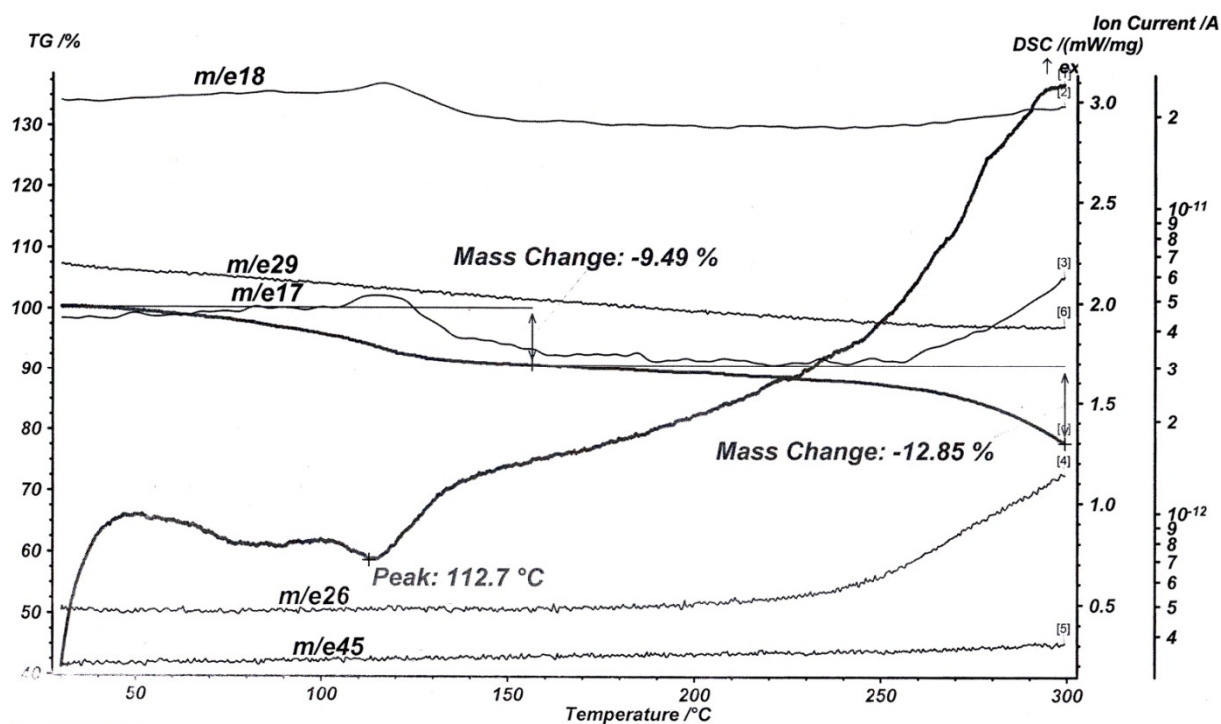

Figure S12. TG-DSC curves and mass spectra for complex **2** after drying in vacuum.

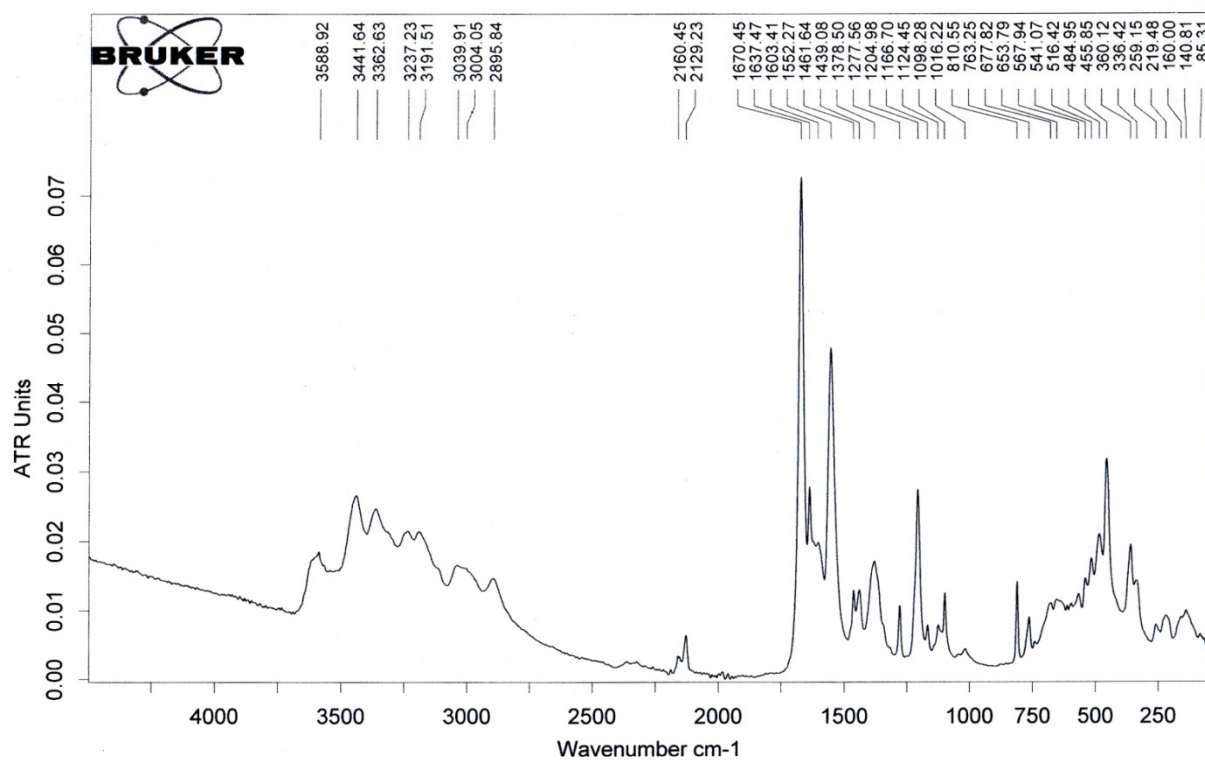

Figure S13. IR spectrum of the complex **2**.

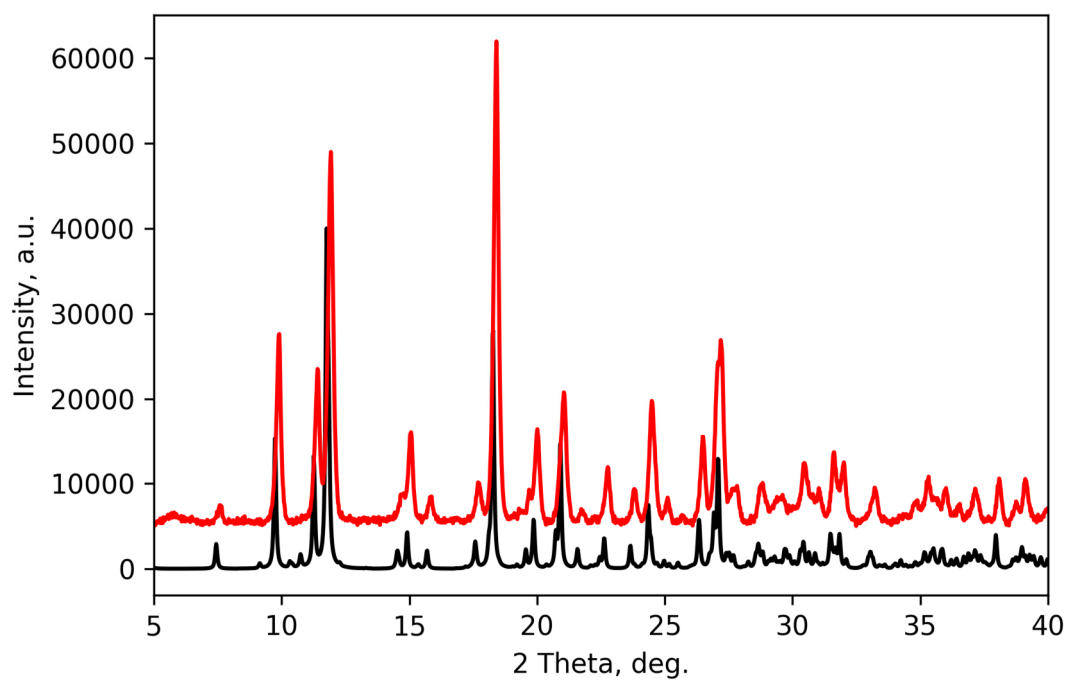

Figure S14. A comparison of the powder diffraction pattern for a dried sample of **2** at 293 K (red) and single crystal simulation of **2** at 120 K (black).

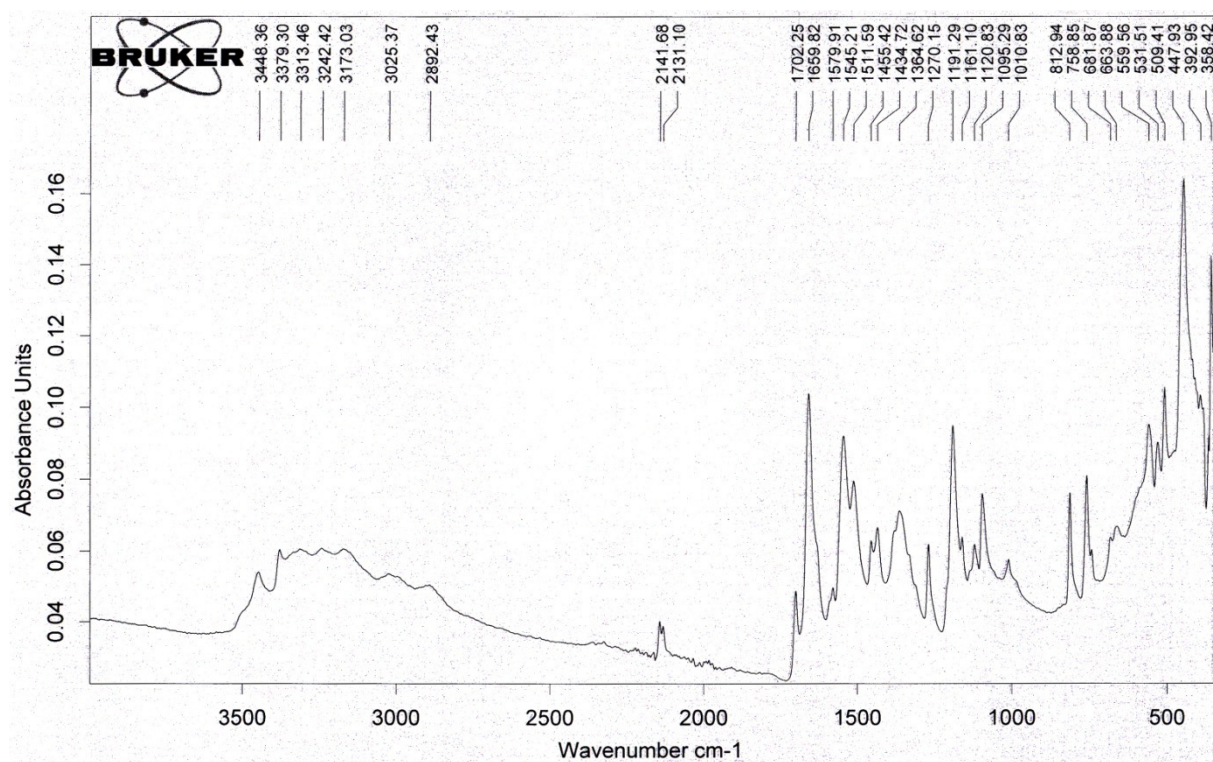

Figure S15. IR spectrum of the complex 3.

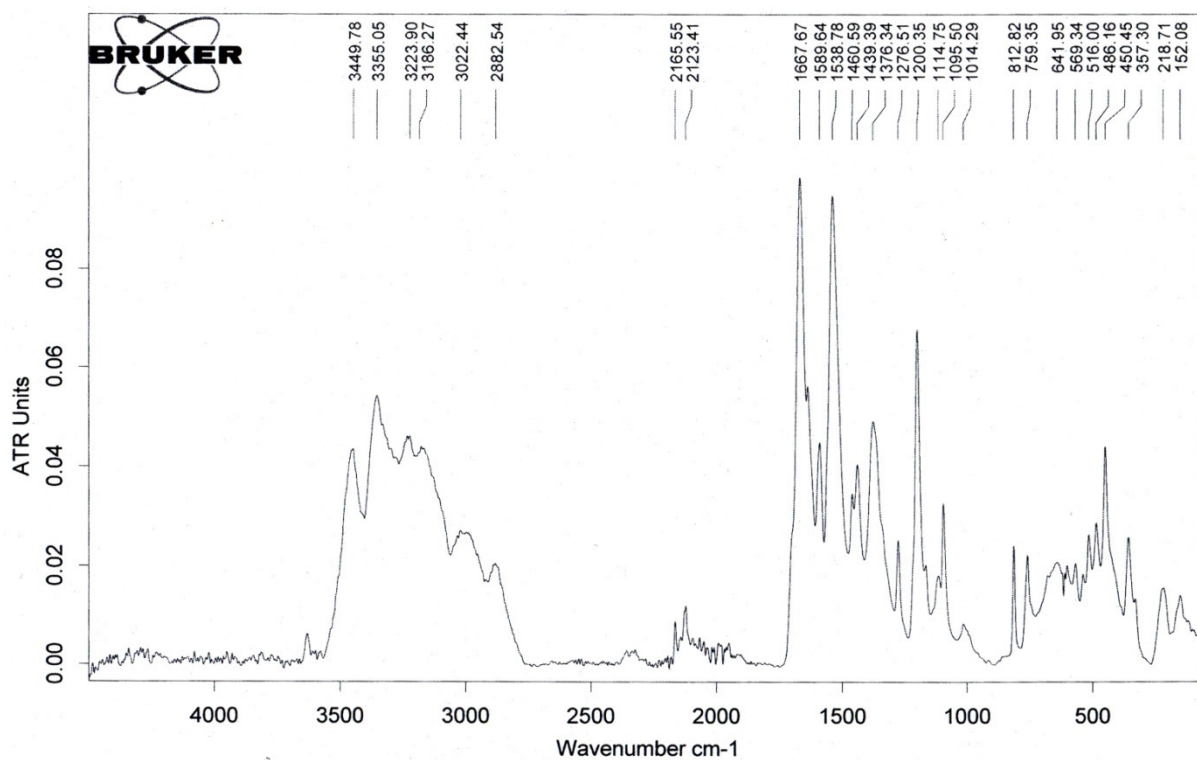

Figure S16. IR spectrum of the complex 4.
